# Supplementary material
Source: PubMed Central journal article supplement (PMC9022672)
Supplement: NIHMS1787244-supplement-SI_2.pdf [file NIHMS1787244-supplement-SI_2.pdf]

| <b>Protein Variant</b> | <b>Nucleotide Sequence</b>                                       |
|------------------------|------------------------------------------------------------------|
| Parent F2              | ATGACAATTAAGAAATGCCTCAGCCAAAAACGTTTGGAGAGCTTAAAAATTTACCGTTATTAAC |
| Parent F2.1            | ATGACAATTAAGAAATGCCTCAGCCAAAAACGTTTGGAGAGCTTAAAAATTTACCGTTATTAAC |
| Parent F2.2            | ATGACAATTAAGAAATGCCTCAGCCAAAAACGTTTGGAGAGCTTAAAAATTTACCGTTATTAAC |
| Parent F2.3            | ATGACAATTAAGAAATGCCTCAGCCAAAAACGTTTGGAGAGCTTAAAAATTTACCGTTATTAAC |
| Parent F2.4            | ATGACAATTAAGAAATGCCTCAGCCAAAAACGTTTGGAGAGCTTAAAAATTTACCGTTATTAAC |
| Parent F2.5            | ATGACAATTAAGAAATGCCTCAGCCAAAAACGTTTGGAGAGCTTAAAAATTTACCGTTATTAAC |
| Parent F2.6            | ATGACAATTAAGAAATGCCTCAGCCAAAAACGTTTGGAGAGCTTAAAAATTTACCGTTATTAAC |
| Parent F2.7            | ATGACAATTAAGAAATGCCTCAGCCAAAAACGTTTGGAGAGCTTAAAAATTTACCGTTATTAAC |
| Parent F2.8            | ATGACAATTAAGAAATGCCTCAGCCAAAAACGTTTGGAGAGCTTAAAAATTTACCGTTATTAAC |
| Parent F2.9            | ATGACAATTAAGAAATGCCTCAGCCAAAAACGTTTGGAGAGCTTAAAAATTTACCGTTATTAAC |
| P411-AzetS             | ATGACAATTAAGAAATGCCTCAGCCAAAAACGTTTGGAGAGCTTAAAAATTTACCGTTATTAAC |

:ACAGATAAACCGGTTCAAGCTTTGATGAAAATTGCGGATGAATTAGGAGAAATCTTTAAATTCGAGGCGCCTGGTCGTG'  
:ACAGATAAACCGGTTCAAGCTTTGATGAAAATTGCGGATGAATTAGGAGAAATCTTTAAATTCGAGGCGCCTGGTCGTG'  
:ACAGATAAACCGGTTCAAGCTTTGATGAAAATTGCGGATGAATTAGGAGAAATCTTTAAATTCGAGGCGCCTGGTCGTG'  
:ACAGATAAACCGGTTCAAGCTTTGATGAAAATTGCGGATGAATTAGGAGAAATCTTTAAATTCGAGGCGCCTGGTCGTG'  
:ACAGATAAACCGGTTCAAGCTTTGATGAAAATTGCGGATGAATTAGGAGAAATCTTTAAATTCGAGGCGCCTGGTCGTG'  
:ACAGATAAACCGGTTCAAGCTTTGATGAAAATTGCGGATGAATTAGGAGAAATCTTTAAATTCGAGGCGCCTGGTCGTG'  
:ACAGATAAACCGGTTCAAGCTTTGATGAAAATTGCGGATGAATTAGGAGAAATCTTTAAATTCGAGGCGCCTGGTCGTG'  
:ACAGATAAACCGGTTCAAGCTTTGATGAAAATTGCGGATGAATTAGGAGAAATCTTTAAATTCGAGGCGCCTGGTCGTG'  
:ACAGATAAACCGGTTCAAGCTTTGATGAAAATTGCGGATGAATTAGGAGAAATCTTTAAATTCGAGGCGCCTGGTCAGG'  
:ACAGATAAACCGGTTCAAGCTTTGATGAAAATTGCGGATGAATTAGGAGAAATCTTTAAATTCGAGGCGCCTGGTCAGG'

TAACGCGCTACTTATCAAGTCAGCGTCTAATTAAGAAGCATGCGATGAATCACGCTTTGATAAAAACTTAAGTCAAGCGC  
TAACGCGCTACTTATCAAGTCAGCGTCTAATTAAGAAGCATGCGATGAATCACGCTTTGATAAAAACTTAAGTCAAGCGC  
TAACGCGCTACTTATCAAGTCAGCGTCTAATTAAGAAGCATGCGATGAATCACGCTTTGATAAAAACTTAAGTCAAGCGC  
TAACGCGCTACTTATCAAGTCAGCGTCTAATTAAGAAGCATGCGATGAATCACGCTTTGATAAAAACTTAAGTCAAGCGC  
TAACGCGCTACTTATCAAGTCAGCGTCTAATTAAGAAGCATGCGATGAATCACGCTTTGATAAAAACTTAAGTCAAGCGC  
TAACGCGCTACTTATCAAGTCAGCGTCTAATTAAGAAGCATGCGATGAATCACGCTTTGATAAAAACTTAAGTCAAGCGC  
TAACGCGCTACTTATCAAGTCAGCGTCTAATTAAGAAGCATGCGATGAATCACGCTTTGATAAAAACTTAAGTCAAGCGC  
TAACGCGCTACTTATCAAGTCAGCGTCTAATTAAGAAGCATGCGATGAATCACGCTTTGATAAAAACTTAAGTCAAGCGC  
TAACGCGCTATTTATCAAGTCAGCGTCTAATTAAGAAGCATGCGATGAATCACGCTTTGATAAAAACTTAAGTCAAGCGC  
TAACGCGCTATTTATCAAGTCAGCGTCTAATTAAGAAGCATGCGATGAATCACGCTTTGATAAAAACTTAAGTCAAGCGC







;TCTTTGCGGCTTTAACTATCGCTTTAACAGCTTTTACCGAGATCAGCCTCATCCATTTATTATAAGTATGGTCCGTGCACTG  
;TCTTTGCGGCTTTAACTATCGCTTTAACAGCTTTTACCGAGATCAGCCTCATCCATTTATTATAAGTATGGTCCGTGCACTG  
;TCTTTGCGGCTTTAACTATCGCTTTAACAGCTTTTACCGAGATCAGCCTCATCCATTTATTATAAGTATGGTCCGTGCACTG  
;TCTTTGCGGCTTTAACTATCGCTTTAACAGCTTTTACCGAGATCAGCCTCATCCATTTATTATAAGTATGGTCCGTGCACTG  
;TCTTTGCGGCTTTAACTATCGCTTTAACAGCTTTTACCGAGATCAGCCTCATCCATTTATTATAAGTATGGTCCGTGCACTG  
;TCTTTGCGGCTTTAACTATCGCTTTAACAGCTTTTACCGAGATCAGCCTCATCCATTTATTATAAGTCAGGTCCGTGCTCTG  
;TCTTTGCGGCTTTAACTATCGCTTTAACAGCTTTTACCGAGATCAGCCTCATCCATTTATTATAAGTCAGGTCCGTGCTCTG  
;TCTTTGCGGCTTTAACTATCGCTTTAACAGCTTTTACCGAGATCAGCCTCATCCATTTATTATAAGTCAGGTCCGTGCTCTG  
;TCTTTGCGGCTTTAACTATCGCTTTAACAGCTTTTACCGAGATCAGCCTCATCCATTTATTATAAGTCAGGTCCGTGCTCTG  
;TCTTTGCGGCTTTAACTATCGCTTTAACAGCTTTTACCGAGATCAGCCTCATCCATTTATTATAAGTCAGGTCCGTGCTCTG

















| <b>Protein Variant</b> | <b>Amino Acid Sequence</b>                                           |
|------------------------|----------------------------------------------------------------------|
| Parent F2              | MTIKEMPQPKTFGELKNLPLLNTDKPVQALMKIADELGEIFKFEAPGRVTRYLSSQRLIKEACDESRF |
| Parent F2.1            | MTIKEMPQPKTFGELKNLPLLNTDKPVQALMKIADELGEIFKFEAPGRVTRYLSSQRLIKEACDESRF |
| Parent F2.2            | MTIKEMPQPKTFGELKNLPLLNTDKPVQALMKIADELGEIFKFEAPGRVTRYLSSQRLIKEACDESRF |
| Parent F2.3            | MTIKEMPQPKTFGELKNLPLLNTDKPVQALMKIADELGEIFKFEAPGRVTRYLSSQRLIKEACDESRF |
| Parent F2.4            | MTIKEMPQPKTFGELKNLPLLNTDKPVQALMKIADELGEIFKFEAPGRVTRYLSSQRLIKEACDESRF |
| Parent F2.5            | MTIKEMPQPKTFGELKNLPLLNTDKPVQALMKIADELGEIFKFEAPGRVTRYLSSQRLIKEACDESRF |
| Parent F2.6            | MTIKEMPQPKTFGELKNLPLLNTDKPVQALMKIADELGEIFKFEAPGRVTRYLSSQRLIKEACDESRF |
| Parent F2.7            | MTIKEMPQPKTFGELKNLPLLNTDKPVQALMKIADELGEIFKFEAPGRVTRYLSSQRLIKEACDESRF |
| Parent F2.8            | MTIKEMPQPKTFGELKNLPLLNTDKPVQALMKIADELGEIFKFEAPGRVTRYLSSQRLIKEACDESRF |
| Parent F2.9            | MTIKEMPQPKTFGELKNLPLLNTDKPVQALMKIADELGEIFKFEAPGVTRYLSSQRLIKEACDESRF  |
| P411-AzetS             | MTIKEMPQPKTFGELKNLPLLNTDKPVQALMKIADELGEIFKFEAPGVTRYLSSQRLIKEACDESRF  |





√TRLTLDTIGLCGFNYRFNSFYRDQPHPFIIISMVRALDEVMNKLQRANPDDPAYDENKRQFQEDIKVMNDLVDKIIADRKA  
√TRLTLDTIGLCGFNYRFNSFYRDQPHPFIIISMVRALDEVMNKLQRANPDDPAYDENKRQFQEDIKVMNDLVDKIIADRKA  
√TRLTLDTIGLCGFNYRFNSFYRDQPHPFIIISMVRALDEVMNKLQRANPDDPAYDENKRQFQEDIKVMNDLVDKIIADRKA  
√TRLTLDTIGLCGFNYRFNSFYRDQPHPFIIISMVRALDEVMNKLQRANPDDPAYDENKRQFQEDIKVMNDLVDKIIADRKA  
√TRLTLDTIGLCGFNYRFNSFYRDQPHPFIIISQVRALDEVMNKLQRANPDDPAYDENKRQFQEDIKVMNDLVDKIIADRKA  
√TRLTLDTIGLCGFNYRFNSFYRDQPHPFIIISQVRALDEVMNKLQRANPDDPAYDENKRQFQEDIKVMNDLVDKIIADRKA  
√TRLTLDTIGLCGFNYRFNSFYRDQPHPFIIISQVRALDEVMNKLQRANPDDPAYDENKRQFQEDIKVMNDLVDKIIADRKA  
√TRLMLDTIGLCGFNYRFNSFYRDQPHPFIIISQVRALDEVMNKLQRANPDDPAYDENKRQFQEDIKVMNDLVDKIIADRKA/  
√TRLMLDTIGLCGFNYRFNSFYRDQPHPFIIISQVRALDEVMNKLQRANPDDPAYDENKRQFQEDIKVMNDLVDKIIADRKA/  
√TRLMLDTIGLCGFNYRFNSFYRDQPHPFIIISQVRALDEVMNKLQRANPDDPAYDENKRQFQEDIKVMNDLVDKIIADRKA



.VKQLKYVGMVLNEALRLWPTAPAFSLYAKEDTVLGGEYPLEKGDEVMVLIPQLHRDKTVWGDDVEEFRPERFENPSAIPQI  
√KQLKYVGMVLNEALRLWPTAPAFSLYAKEDTVLGGEYPLEKGDEVMVLIPQLHRDKTVWGDDVEEFRPERFENPSAIPQF  
√KQLKYVGMVLNEALRLWPVAPAFSLYAKEDTVLGGEYPLEKGDEVMVLIPQLHRDKTVWGDDVEEFRPERFENPSAIPQI  
√KQLKYVGMVLNEALRLWPVAPTFSLYAKEDTVLGGEYPLEKGDEVMVLIPQLHRDKTVWGDDVEEFRPERFENPSAIPQF  
/KQLKYVGMVLNEALRLWPVAPTFSLYAKEDTVLGGEYPLEKGDEVMVLIPQLHRDKTVWGDDVEEFRPERFENPSAIPQH  
'KQLKYVGMVLNEALRLWPVAPTFSLYAKEDTVLGGEYPLEKGDEVMVLIPQLHRDKTVWGDDVEEFRPERFENPSAIPQH  
'KQLKYVGMVLNEALRLWPVAPTFSLYAKEDTVLGGEYPLEKGDEVMVLIPQLHRDKTVWGDDVEEFRPERFENPSAIPQH  
'KQLKYVGMVLNEALRLWPVAPTFSLYAKEDTVLGGEYPLEKGDEVMVLIPQLHRDKTVWGDDVEEFRPERFENPSAIPQH  
VKQLKYVGMVLNEALRLWPVAPTFSLYAKEDTVLGGEYPLEKGDEVMVLIPQLHRDKTVWGDDVEEFRPERFENPSAIPQI  
.VKQLKYVGMVLNEALRLWPVAPTFSLYAKEDTVLGGEYPLEKGDEVMVLIPQLHRDKTVWGDDVEEFRPERFENPSAIPQI  
/KQLKYVGMVLNEALRLWPVAPTFSLYAKEDTVLGGEYPLEKGDEVMVLIPQLHRDKTVWGDDVEEFRPERFENPSAIPQH





WLDQASADEVKGVRYSVFGCGDKNWATTYQKVPAFIDETLAAKGAENIADRGEADASDDFEGTYEEWREHMWSDVAAYI  
/LDQASADEVKGVRYSVFGCGDKNWATTYQKVPAFIDETLAAKGAENIADRGEADASDDFEGTYEEWREHMWSDVAAYF  
WLDQASADEVKGVRYSVFGCGDKNWATTYQKVPAFIDETLAAKGAENIADRGEADASDDFEGTYEEWREHMWSDVAAYF  
/LDQASADEVKGVRYSVFGCGDKNWATTYQKVPAFIDETLAAKGAENIADRGEADASDDFEGTYEEWREHMWSDVAAYF  
/LDQASADEVKGVRYSVFGCGDKNWATTYQKVPAFIDETLAAKGAENIADRGEADASDDFEGTYEEWREHMWSDVAAYF  
VLDQASADEVKGVRYSVFGCGDKNWATTYQKVPAFIDETLAAKGAENIADRGEADASDDFEGTYEEWREHMWSDVAAYFI  
/LDQASADEVKGVRYSVFGCGDKNWATTYQKVPAFIDETLAAKGAENIADRGEADASDDFEGTYEEWREHMWSDVAAYF  
/LDQASADEVKGVRYSVFGCGDKNWATTYQKVPAFIDETLAAKGAENIADRGEADASDDFEGTYEEWREHMWSDVAAYF  
WLDQASADEVKGVRYSVFGCGDKNWATTYQKVPAFIDETLAAKGAENIADRGEADASDDFEGTYEEWREHMWSDVAAY  
'WLDQASADEVKGVRYSVFGCGDKNWATTYQKVPAFIDETLAAKGAENIADRGEADASDDFEGTYEEWREHMWSDVAAY  
WLDQASADEVKGVRYSVFGCGDKNWATTYQKVPAFIDETLAAKGAENIADRGEADASDDFEGTYEEWREHMWSDVAAYI

FNLDIENSEDNKSTLSLQFVDSAADMPLAKMHGAFSTNVVASKELQQPGSARSTRHLEIELPKEASYQEGDHLGVIPRNYEG  
:NLDIENSEDNKSTLSLQFVDSAADMPLAKMHGAFSTNVVASKELQQPGSARSTRHLEIELPKEASYQEGDHLGVIPRNYEGI  
:NLDIENSEDNKSTLSLQFVDSAADMPLAKMHGAFSTNVVASKELQQPGSARSTRHLEIELPKEASYQEGDHLGVIPRNYEGI  
:NLDIENSEDNKSTLSLQFVDSAADMPLAKMHGAFSTNVVASKELQQPGSARSTRHLEIELPKEASYQEGDHLGVIPRNYEGI  
NLDIENSEDNKSTLSLQFVDSAADMPLAKMHGAFSTNVVASKELQQPGSARSTRHLEIELPKEASYQEGDHLGVIPRNYEGI'  
NLDIENSEDNKSTLSLQFVDSAADMPLAKMHGAFSTNVVASKELQQPGSARSTRHLEIELPKEASYQEGDHLGVIPRNYEGI\  
NLDIENSEDNKSTLSLQFVDSAADMPLAKMHGAFSTNVVASKELQQPGSARSTRHLEIELPKEASYQEGDHLGVIPRNYEGI'  
NLDIENSEDNKSTLSLQFVDSAADMPLAKMHGAFSTNVVASKELQQPGSARSTRHLEIELPKEASYQEGDHLGVIPRNYEGI'  
FNLDIENSEDNKSTLSLQFVDSAADMPLAKMHGAFSTNVVASKELQQPGSARSTRHLEIELPKEASYQEGDHLGVIPRNYEG  
'FNLDIENSEDNKSTLSLQFVDSAADMPLAKMHGAFSTNVVASKELQQPGSARSTRHLEIELPKEASYQEGDHLGVIPRNYEG  
:NLDIENSEDNKSTLSLQFVDSAADMPLAKMHGAFSTNVVASKELQQPGSARSTRHLEIELPKEASYQEGDHLGVIPRNYEGI





/LAKRLTMLELLEKYPACEMKFSEFIALLPSIRPRYYSSISSPRVDEKQASITVSVVSGEAWSGYGEYKGIASNYLAELQEGDTITC  
'LAKRLTMLELLEKYPACEMKFSEFIALLPSIRPRYYSSISSPRVDEKQASITVSVVSGEAWSGYGEYKGIASNYLAELQEGDTITC  
'LAKRLTMLELLEKYPACEMKFSEFIALLPSIRPRYYSSISSPRVDEKQASITVSVVSGEAWSGYGEYKGIASNYLAELQEGDTITC  
'LAKRLTMLELLEKYPACEMKFSEFIALLPSIRPRYYSSISSPRVDEKQASITVSVVSGEAWSGYGEYKGIASNYLAELQEGDTITC  
\_AKRLTMLELLEKYPACEMKFSEFIALLPSIRPRYYSSISSPRVDEKQASITVSVVSGEAWSGYGEYKGIASNYLAELQEGDTITC  
LAKRLTMLELLEKYPACEMKFSEFIALLPSIRPRYYSSISSPRVDEKQASITVSVVSGEAWSGYGEYKGIASNYLAELQEGDTITC  
LAKRLTMLELLEKYPACEMKFSEFIALLPSIRPRYYSSISSPRVDEKQASITVSVVSGEAWSGYGEYKGIASNYLAELQEGDTITC  
/LAKRLTMLELLEKYPACEMKFSEFIALLPSIRPRYYSSISSPRVDEKQASITVSVVSGEAWSGYGEYKGIASNYLAELQEGDTITC  
VLAKRLTMLELLEKYPACEMKFSEFIALLPSIRPRYYSSISSPRVDEKQASITVSVVSGEAWSGYGEYKGIASNYLAELQEGDTITC  
/LAKRLTMLELLEKYPACEMKFSEFIALLPSIRPRYYSSISSPRVDEKQASITVSVVSGEAWSGYGEYKGIASNYLAELQEGDTITC

CFISTPQSEFTLPKDPETPLIMVGP GTGVAPFRGFVQARKQLKEQGQSLGEAHL YFGCRSPHEDYLYQEELENAQSEGIITLHT,  
:FISTPQSEFTLPKDPETPLIMVGP GTGVAPFRGFVQARKQLKEQGQSLGEAHL YFGCRSPHEDYLYQEELENAQSEGIITLHT/  
:FISTPQSEFTLPKDPETPLIMVGP GTGVAPFRGFVQARKQLKEQGQSLGEAHL YFGCRSPHEDYLYQEELENAQSEGIITLHT,  
:FISTPQSEFTLPKDPETPLIMVGP GTGVAPFRGFVQARKQLKEQGQSLGEAHL YFGCRSPHEDYLYQEELENAQSEGIITLHT/  
FISTPQSEFTLPKDPETPLIMVGP GTGVAPFRGFVQARKQLKEQGQSLGEAHL YFGCRSPHEDYLYQEELENAQSEGIITLHT/  
-FISTPQSEFTLPKDPETPLIMVGP GTGVAPFRGFVQARKQLKEQGQSLGEAHL YFGCRSPHEDYLYQEELENAQSEGIITLHTA  
FISTPQSEFTLPKDPETPLIMVGP GTGVAPFRGFVQARKQLKEQGQSLGEAHL YFGCRSPHEDYLYQEELENAQSEGIITLHT/  
FISTPQSEFTLPKDPETPLIMVGP GTGVAPFRGFVQARKQLKEQGQSLGEAHL YFGCRSPHEDYLYQEELENAQSEGIITLHT/  
CFISTPQSEFTLPKDPETPLIMVGP GTGVAPFRGFVQARKQLKEQGQSLGEAHL YFGCRSPHEDYLYQEELENAQSEGIITLHT  
CFISTPQSEFTLPKDPETPLIMVGP GTGVAPFRGFVQARKQLKEQGQSLGEAHL YFGCRSPHEDYLYQEELENAQSEGIITLHT  
:FISTPQSEFTLPKDPETPLIMVGP GTGVAPFRGFVQARKQLKEQGQSLGEAHL YFGCRSPHEDYLYQEELENAQSEGIITLHT,
